# Supplementary material for: Stability of gene expression and epigenetic profiles highlights the utility of patient-derived paediatric acute lymphoblastic leukaemia xenografts for investigating molecular mechanisms of drug resistance
Source: PubMed Central journal article supplement (PMC4057609; doi:10.1186/1471-2164-15-416), 2014-06-01

A.

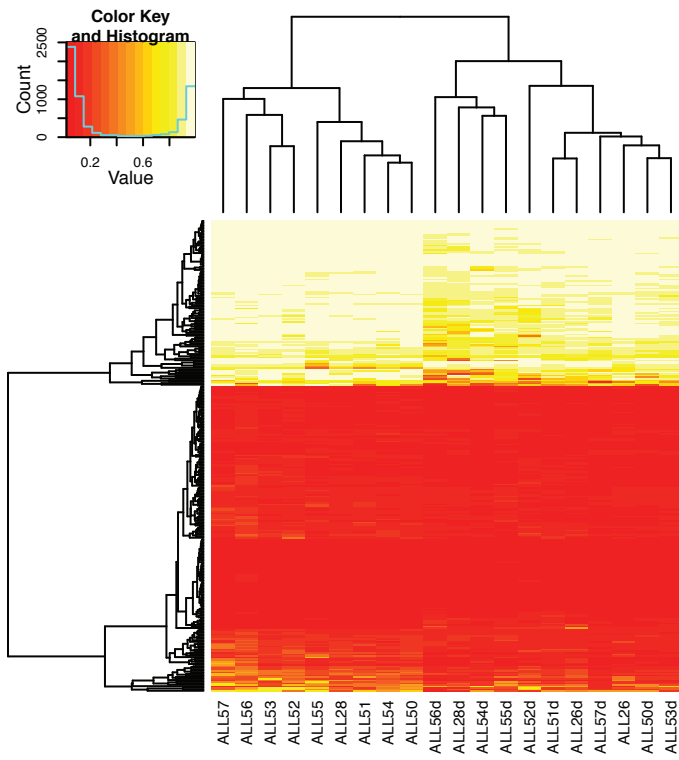

B.

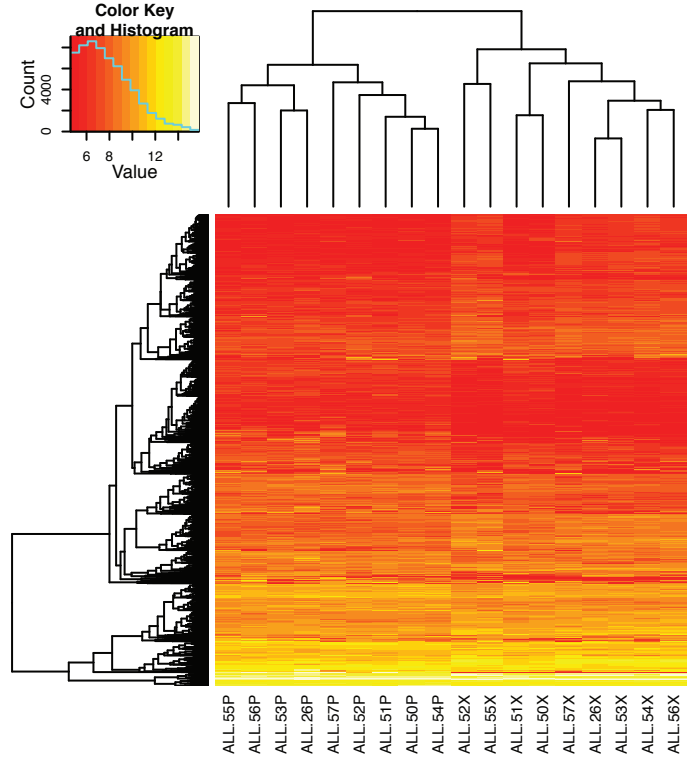

Supplement: 12864_2013_6106_MOESM3_ESM.pdf [file 12864_2013_6106_MOESM3_ESM.pdf]
